# Supplementary material for: Quantification of Circulating Cell-Free DNA in Idiopathic Parkinson’s Disease Patients
Source: Preprints.org preprint supplement (doi:10.20944/preprints202401.2035.v1), 2024-01-29
Supplement: Supplementary file 1 [file supplementary]

## Sheet: ddPCR repitition 1
Well	ExptType	Experiment	Sample	TargetType	Target	Status	Concentration	Supermix	CopiesPer20uLWell	TotalConfMax	TotalConfMin	PoissonConfMax	PoissonConfMin	Positives	Negatives	AcceptedDroplets	CNV	TotalCNVMax	TotalCNVMin	PoissonCNVMax	PoissonCNVMin	ReferenceCopies	UnknownCopies	Ratio	TotalRatioMax	TotalRatioMin	PoissonRatioMax	PoissonRatioMin	FractionalAbundance	TotalFractionalAbundanceMax	TotalFractionalAbundanceMin	PoissonFractionalAbundanceMax	PoissonFractionalAbundanceMin	ReferenceAssayNumber	TargetAssayNumber	Threshold	MeanAmplitudeofPositives	MeanAmplitudeofNegatives	MeanAmplitudeTotal	ExperimentComments	MergedWells	TotalConfMax68	TotalConfMin68	PoissonConfMax68	PoissonConfMin68	TotalCNVMax68	TotalCNVMin68	PoissonCNVMax68	PoissonCNVMin68
A01	Absolute Quantification	ABS	1PMR_PD_COX3	Ch1Unknown	COX3	CHECK	No Call	QX200 ddPCR EvaGreen Supermix						175	7200	7375																		1	1	4785	11889	3197.3	3403.6
E03	Absolute Quantification	ABS	1PMR_PD_COX3	Ch1Unknown	COX3	CHECK	No Call	QX200 ddPCR EvaGreen Supermix						144	8402	8546																		1	1	3980	12613	2608.2	2776.7
A04	Absolute Quantification	ABS	1PMR_PD_KRAS2	Ch1Unknown	KRAS2	CHECK	No Call	QX200 ddPCR EvaGreen Supermix						0	13068	13068																		1	1	0	0	2372.9	2372.9
E06	Absolute Quantification	ABS	1PMR_PD_KRAS2	Ch1Unknown	KRAS2	CHECK	No Call	QX200 ddPCR EvaGreen Supermix						0	13823	13823																		1	1	0	0	2215.9	2215.9
B01	Absolute Quantification	ABS	2PMR_PD_COX3	Ch1Unknown	COX3	OK	2.2	QX200 ddPCR EvaGreen Supermix	44			3.1	1.4	24	13057	13081																		1	1	3798	11110	3103	3117.7					2.63	1.75
F03	Absolute Quantification	ABS	2PMR_PD_COX3	Ch1Unknown	COX3	CHECK	No Call	QX200 ddPCR EvaGreen Supermix						0	10708	10708																		1	1	0	0	2915.8	2915.8
B04	Absolute Quantification	ABS	2PMR_PD_KRAS2	Ch1Unknown	KRAS2	CHECK	No Call	QX200 ddPCR EvaGreen Supermix						0	12188	12188																		1	1	0	0	2355.6	2355.6
F06	Absolute Quantification	ABS	2PMR_PD_KRAS2	Ch1Unknown	KRAS2	OK	1.8	QX200 ddPCR EvaGreen Supermix	36			2.7	1.2	21	13429	13450																		1	1	2580	3187.1	2209.7	2211.2					2.27	1.47
C01	Absolute Quantification	ABS	3PMR_PD_COX3	Ch1Unknown	COX3	OK	1	QX200 ddPCR EvaGreen Supermix	20			1.7	0.5	10	12227	12237																		1	1	3504	8841.5	3119.6	3124.2					1.3	0.69
G03	Absolute Quantification	ABS	3PMR_PD_COX3	Ch1Unknown	COX3	OK	1	QX200 ddPCR EvaGreen Supermix	20			1.8	0.5	10	11707	11717																		1	1	3301	11418	2882.7	2890					1.36	0.72
G06	Absolute Quantification	ABS	3PMR_PD_KRAS2	Ch1Unknown	KRAS2	OK	2.3	QX200 ddPCR EvaGreen Supermix	46			3.3	1.5	25	12950	12975																		1	1	2453	2857.7	2198.6	2199.8					2.75	1.85
C04	Absolute Quantification	ABS	3PMR_PD_KRAS2	Ch1Unknown	KRAS2	CHECK	No Call	QX200 ddPCR EvaGreen Supermix						0	10437	10437																		1	1	0	0	2339.3	2339.3
D01	Absolute Quantification	ABS	4PMR_PD_COX3	Ch1Unknown	COX3	OK	4.6	QX200 ddPCR EvaGreen Supermix	92			6.1	3.4	47	11932	11979																		1	1	3970	11702	3094.4	3128.2					5.3	4
H03	Absolute Quantification	ABS	4PMR_PD_COX3	Ch1Unknown	COX3	CHECK	No Call	QX200 ddPCR EvaGreen Supermix						0	10412	10412																		1	1	0	0	2897.6	2897.6
H06	Absolute Quantification	ABS	4PMR_PD_KRAS2	Ch1Unknown	KRAS2	CHECK	No Call	QX200 ddPCR EvaGreen Supermix						0	12937	12937																		1	1	0	0	2197.8	2197.8
D04	Absolute Quantification	ABS	4PMR_PD_KRAS2	Ch1Unknown	KRAS2	CHECK	No Call	QX200 ddPCR EvaGreen Supermix						0	10074	10074																		1	1	0	0	2314.8	2314.8
E01	Absolute Quantification	ABS	5PMR_PD_COX3	Ch1Unknown	COX3	OK	8	QX200 ddPCR EvaGreen Supermix	160			9.9	6.3	79	11622	11701																		1	1	3990	11303	3054.6	3110.2					8.9	7.1
E04	Absolute Quantification	ABS	5PMR_PD_KRAS2	Ch1Unknown	KRAS2	CHECK	No Call	QX200 ddPCR EvaGreen Supermix						0	13305	13305																		1	1	0	0	2252.5	2252.5
F01	Absolute Quantification	ABS	6PMR_PD_COX3	Ch1Unknown	COX3	OK	2.6	QX200 ddPCR EvaGreen Supermix	52			3.7	1.7	27	12219	12246																		1	1	3486	12018	3063.3	3083.1					3.13	2.13
F04	Absolute Quantification	ABS	6PMR_PD_KRAS2	Ch1Unknown	KRAS2	CHECK	No Call	QX200 ddPCR EvaGreen Supermix						0	11259	11259																		1	1	0	0	2254.3	2254.3
G01	Absolute Quantification	ABS	7PMR_PD_COX3	Ch1Unknown	COX3	OK	26	QX200 ddPCR EvaGreen Supermix	520			29.2	22.7	245	10969	11214																		1	1	3702	13300	3023	3247.6					27.6	24.3
G04	Absolute Quantification	ABS	7PMR_PD_KRAS2	Ch1Unknown	KRAS2	CHECK	No Call	QX200 ddPCR EvaGreen Supermix						0	13018	13018																		1	1	0	0	2277	2277
H01	Absolute Quantification	ABS	8PMR_PD_COX3	Ch1Unknown	COX3	OK	25.7	QX200 ddPCR EvaGreen Supermix	514			28.8	22.7	274	12402	12676																		1	1	4203	13295	3027.2	3249.1					27.3	24.2
H04	Absolute Quantification	ABS	8PMR_PD_KRAS2	Ch1Unknown	KRAS2	OK	1.4	QX200 ddPCR EvaGreen Supermix	28			2.3	0.8	15	12190	12205																		1	1	2597	3329.1	2269.4	2270.7					1.85	1.1
A02	Absolute Quantification	ABS	9PMR_PD_COX3	Ch1Unknown	COX3	OK	4.2	QX200 ddPCR EvaGreen Supermix	84			5.6	3.1	45	12496	12541																		1	1	3498	12790	2959.9	2995.2					4.9	3.6
A05	Absolute Quantification	ABS	9PMR_PD_KRAS2	Ch1Unknown	KRAS2	CHECK	No Call	QX200 ddPCR EvaGreen Supermix						0	12973	12973																		1	1	0	0	2253.2	2253.2
B02	Absolute Quantification	ABS	10PMR_PD_COX3	Ch1Unknown	COX3	OK	8.5	QX200 ddPCR EvaGreen Supermix	170			10.4	6.9	95	13033	13128																		1	1	3928	12805	2935.6	3007.1					9.5	7.7
B05	Absolute Quantification	ABS	10PMR_PD_KRAS2	Ch1Unknown	KRAS2	CHECK	No Call	QX200 ddPCR EvaGreen Supermix						0	13965	13965																		1	1	0	0	2246	2246
C02	Absolute Quantification	ABS	11PMR_PD_COX3	Ch1Unknown	COX3	OK	24	QX200 ddPCR EvaGreen Supermix	480			27	21	246	11933	12179																		1	1	4266	13272	3004.4	3211.8					25.5	22.5
C05	Absolute Quantification	ABS	11PMR_PD_KRAS2	Ch1Unknown	KRAS2	CHECK	No Call	QX200 ddPCR EvaGreen Supermix						21	13447	13468																		1	1	2485	2783.6	2228.6	2229.4
D02	Absolute Quantification	ABS	12PMR_PD_COX3	Ch1Unknown	COX3	OK	4.6	QX200 ddPCR EvaGreen Supermix	92			6.1	3.4	47	11917	11964																		1	1	4794	13101	3053.9	3093.4					5.3	4
D05	Absolute Quantification	ABS	12PMR_PD_KRAS2	Ch1Unknown	KRAS2	OK	1.1	QX200 ddPCR EvaGreen Supermix	22			1.8	0.6	12	13065	13077																		1	1	2554	3419.9	2215.4	2216.5					1.42	0.8
E02	Absolute Quantification	ABS	13PMR_PD_COX3	Ch1Unknown	COX3	OK	8.1	QX200 ddPCR EvaGreen Supermix	162			10.1	6.3	71	10330	10401																		1	1	4175	11345	2945.6	3002.9					9.1	7.1
E05	Absolute Quantification	ABS	13PMR_PD_KRAS2	Ch1Unknown	KRAS2	CHECK	No Call	QX200 ddPCR EvaGreen Supermix						0	13063	13063																		1	1	0	0	2203.2	2203.2
F02	Absolute Quantification	ABS	1PMR_K_COX3	Ch1Unknown	COX3	CHECK	No Call	QX200 ddPCR EvaGreen Supermix						0	8855	8855																		1	1	0	0	3242.8	3242.8
F05	Absolute Quantification	ABS	1PMR_K_KRAS2	Ch1Unknown	KRAS2	OK	1.9	QX200 ddPCR EvaGreen Supermix	38			2.9	1.2	21	12678	12699																		1	1	2560	3733.2	2191.8	2194.3					2.4	1.55
G02	Absolute Quantification	ABS	2PMR_K_COX3	Ch1Unknown	COX3	OK	28.4	QX200 ddPCR EvaGreen Supermix	568			31.7	25.2	294	12022	12316																		1	1	4790	12941	2867.9	3108.4					30.1	26.8
G05	Absolute Quantification	ABS	2PMR_K_KRAS2	Ch1Unknown	KRAS2	CHECK	No Call	QX200 ddPCR EvaGreen Supermix						0	12885	12885																		1	1	0	0	2199.6	2199.6
H02	Absolute Quantification	ABS	3PMR_K_COX3	Ch1Unknown	COX3	OK	31.5	QX200 ddPCR EvaGreen Supermix	630			35.1	27.9	294	10831	11125																		1	1	4793	12698	2898.8	3157.7					33.3	29.7
H05	Absolute Quantification	ABS	3PMR_K_KRAS2	Ch1Unknown	KRAS2	OK	0.9	QX200 ddPCR EvaGreen Supermix	18			1.6	0.4	9	11903	11912																		1	1	2490	3831.4	2205.3	2206.5					1.22	0.62
A03	Absolute Quantification	ABS	4PMR_K_COX3	Ch1Unknown	COX3	OK	110	QX200 ddPCR EvaGreen Supermix	2200			116	104	1225	12472	13697																		1	1	4839	12804	2866.8	3755.5					113.4	107.1
A06	Absolute Quantification	ABS	4PMR_K_KRAS2	Ch1Unknown	KRAS2	OK	0.8	QX200 ddPCR EvaGreen Supermix	16			1.5	0.4	10	13875	13885																		1	1	2453	7839.5	2181.2	2185.3					1.15	0.61
B03	Absolute Quantification	ABS	5PMR_K_COX3	Ch1Unknown	COX3	OK	40.5	QX200 ddPCR EvaGreen Supermix	810			44.2	36.8	472	13479	13951																		1	1	4781	12736	2890.2	3223.3					42.4	38.6
B06	Absolute Quantification	ABS	5PMR_K_KRAS2	Ch1Unknown	KRAS2	OK	1.4	QX200 ddPCR EvaGreen Supermix	28			2.1	0.8	16	13893	13909																		1	1	2438	5266.1	2171.4	2175					1.72	1.04
C06	Absolute Quantification	ABS	H2O	Ch1NTC	KRAS2	CHECK	No Call	QX200 ddPCR EvaGreen Supermix						0	13026	13026																		1	1	0	0	2219.9	2219.9
D06	Absolute Quantification	ABS	H2O	Ch1NTC	KRAS2	CHECK	No Call	QX200 ddPCR EvaGreen Supermix						0	14136	14136																		1	1	0	0	2208.9	2208.9
C03	Absolute Quantification	ABS	H2O	Ch1NTC	COX3	CHECK	No Call	QX200 ddPCR EvaGreen Supermix						0	9758	9758																		1	1	0	0	2615.2	2615.2
D03	Absolute Quantification	ABS	H2O	Ch1NTC	COX3	CHECK	No Call	QX200 ddPCR EvaGreen Supermix						0	9928	9928																		1	1	0	0	2813.6	2813.6
[truncated: 9 more columns]

## Sheet: ddPCR repitition 2
Well	ExptType	Experiment	Sample	TargetType	Target	Status	Concentration	Supermix	CopiesPer20uLWell	TotalConfMax	TotalConfMin	PoissonConfMax	PoissonConfMin	Positives	Negatives	AcceptedDroplets	CNV	TotalCNVMax	TotalCNVMin	PoissonCNVMax	PoissonCNVMin	ReferenceCopies	UnknownCopies	Ratio	TotalRatioMax	TotalRatioMin	PoissonRatioMax	PoissonRatioMin	FractionalAbundance	TotalFractionalAbundanceMax	TotalFractionalAbundanceMin	PoissonFractionalAbundanceMax	PoissonFractionalAbundanceMin	ReferenceAssayNumber	TargetAssayNumber	Threshold	MeanAmplitudeofPositives	MeanAmplitudeofNegatives	MeanAmplitudeTotal	ExperimentComments	MergedWells	TotalConfMax68	TotalConfMin68	PoissonConfMax68	PoissonConfMin68	TotalCNVMax68	TotalCNVMin68	PoissonCNVMax68	PoissonCNVMin68
A01	Absolute Quantification	ABS	1PMR_PD_COX3	Ch1Unknown	COX3	OK	23.3	QX200 ddPCR EvaGreen Supermix	466			26.3	20.2	228	11419	11647																		1	1	3605	13315	3208.3	3406.1					24.8	21.7
A04	Absolute Quantification	ABS	1PMR_PD_KRAS	Ch1Unknown	KRAS2	OK	2	QX200 ddPCR EvaGreen Supermix	40			2.9	1.3	24	14329	14353																		1	1	2850	3557.6	2236.9	2239.1					2.4	1.59
B01	Absolute Quantification	ABS	2PMR_PD_COX3	Ch1Unknown	COX3	OK	2.4	QX200 ddPCR EvaGreen Supermix	48			3.5	1.6	25	12226	12251																		1	1	3909	11698	3204.5	3221.8					2.92	1.95
B04	Absolute Quantification	ABS	2PMR_PD_KRAS	Ch1Unknown	KRAS2	CHECK	No Call	QX200 ddPCR EvaGreen Supermix						0	13714	13714																		1	1	0	0	2214.6	2214.6
C01	Absolute Quantification	ABS	3PMR_PD_COX3	Ch1Unknown	COX3	OK	2	QX200 ddPCR EvaGreen Supermix	40			3.1	1.3	20	11567	11587																		1	1	4045	10787	3181.9	3195					2.52	1.61
C04	Absolute Quantification	ABS	3PMR_PD_KRAS	Ch1Unknown	KRAS2	CHECK	No Call	QX200 ddPCR EvaGreen Supermix						0	14294	14294																		1	1	0	0	2182.6	2182.6
D01	Absolute Quantification	ABS	4PMR_PD_COX3	Ch1Unknown	COX3	OK	4.4	QX200 ddPCR EvaGreen Supermix	88			5.9	3.2	43	11450	11493																		1	1	3627	11791	3159	3191.3					5.1	3.8
D04	Absolute Quantification	ABS	4PMR_PD_KRAS	Ch1Unknown	KRAS2	CHECK	No Call	QX200 ddPCR EvaGreen Supermix						0	13494	13494																		1	1	0	0	2205.9	2205.9
E01	Absolute Quantification	ABS	5PMR_PD_COX3	Ch1Unknown	COX3	OK	6.8	QX200 ddPCR EvaGreen Supermix	136			8.5	5.3	69	11917	11986																		1	1	3979	12939	3137.2	3193.7					7.6	6
E04	Absolute Quantification	ABS	5PMR_PD_KRAS	Ch1Unknown	KRAS2	OK	1.7	QX200 ddPCR EvaGreen Supermix	34			2.6	1	18	12408	12426																		1	1	2759	4042.6	2142.5	2145.3					2.14	1.33
F01	Absolute Quantification	ABS	6PMR_PD_COX3	Ch1Unknown	COX3	OK	3.4	QX200 ddPCR EvaGreen Supermix	68			4.6	2.4	35	12132	12167																		1	1	4304	11235	3126.4	3149.7					4	2.8
F04	Absolute Quantification	ABS	6PMR_PD_KRAS	Ch1Unknown	KRAS2	OK	3.5	QX200 ddPCR EvaGreen Supermix	70			4.7	2.5	39	13160	13199																		1	1	2369	2824	2156.2	2158.2					4.1	3
G01	Absolute Quantification	ABS	7PMR_PD_COX3	Ch1Unknown	COX3	OK	31.1	QX200 ddPCR EvaGreen Supermix	622			34.6	27.6	309	11536	11845																		1	1	4809	12897	3057.1	3313.8					32.9	29.3
G04	Absolute Quantification	ABS	7PMR_PD_KRAS	Ch1Unknown	KRAS2	OK	1.7	QX200 ddPCR EvaGreen Supermix	34			2.5	1	19	13465	13484																		1	1	2456	3780.3	2168.3	2170.6					2.07	1.31
H01	Absolute Quantification	ABS	8PMR_PD_COX3	Ch1Unknown	COX3	OK	2.5	QX200 ddPCR EvaGreen Supermix	50			3.6	1.7	25	11658	11683																		1	1	3447	5726.9	2956.8	2962.8					3.1	2
H04	Absolute Quantification	ABS	8PMR_PD_KRAS	Ch1Unknown	KRAS2	CHECK	No Call	QX200 ddPCR EvaGreen Supermix						82	12801	12883																		1	1	2413	2598.5	2143	2145.9
A02	Absolute Quantification	ABS	9PMR_PD_COX3	Ch1Unknown	COX3	OK	6	QX200 ddPCR EvaGreen Supermix	120			7.6	4.7	66	12803	12869																		1	1	4169	12490	2976.6	3025.4					6.8	5.3
A05	Absolute Quantification	ABS	9PMR_PD_KRAS	Ch1Unknown	KRAS2	OK	7.6	QX200 ddPCR EvaGreen Supermix	152			9.4	6.1	84	12935	13019																		1	1	2335	2607	2134.8	2137.8					8.5	6.8
B02	Absolute Quantification	ABS	10PMR_PD_COX3	Ch1Unknown	COX3	OK	13.3	QX200 ddPCR EvaGreen Supermix	266			15.4	11.2	153	13507	13660																		1	1	3919	8525.4	3032.9	3094.4					14.3	12.2
B05	Absolute Quantification	ABS	10PMR_PD_KRAS	Ch1Unknown	KRAS2	OK	1.9	QX200 ddPCR EvaGreen Supermix	38			2.9	1.2	20	12416	12436																		1	1	2658	3446.4	2146.1	2148.2					2.35	1.5
C02	Absolute Quantification	ABS	11PMR_PD_COX3	Ch1Unknown	COX3	OK	21.5	QX200 ddPCR EvaGreen Supermix	430			24.3	18.7	234	12687	12921																		1	1	4767	12804	3004.1	3181.6					22.9	20.1
C05	Absolute Quantification	ABS	11PMR_PD_KRAS	Ch1Unknown	KRAS2	OK	0.37	QX200 ddPCR EvaGreen Supermix	7.4			0.88	0.11	4	12593	12597																		1	1	2407	5039	2144	2145					0.6	0.21
D02	Absolute Quantification	ABS	12PMR_PD_COX3	Ch1Unknown	COX3	OK	6	QX200 ddPCR EvaGreen Supermix	120			7.6	4.7	67	13077	13144																		1	1	4176	12705	2987.2	3036.7					6.8	5.3
D05	Absolute Quantification	ABS	12PMR_PD_KRAS	Ch1Unknown	KRAS2	CHECK	No Call	QX200 ddPCR EvaGreen Supermix						0	12854	12854																		1	1	0	0	2129.1	2129.1
E02	Absolute Quantification	ABS	13PMR_PD_COX3	Ch1Unknown	COX3	OK	4	QX200 ddPCR EvaGreen Supermix	80			5.3	2.9	42	12336	12378																		1	1	4168	12403	2968.2	3000.2					4.6	3.4
E05	Absolute Quantification	ABS	13PMR_PD_KRAS	Ch1Unknown	KRAS2	OK	0.7	QX200 ddPCR EvaGreen Supermix	14			1.4	0.3	8	12817	12825																		1	1	2406	4215.9	2101.2	2102.5					1.03	0.5
F02	Absolute Quantification	ABS	1PMR_K_COX3	Ch1Unknown	COX3	OK	42.5	QX200 ddPCR EvaGreen Supermix	850			46.5	38.5	429	11657	12086																		1	1	4639	12693	2941.7	3287.9					44.6	40.5
E03	Absolute Quantification	ABS	1PMR_K_COX3	Ch1Unknown	COX3	OK	23.7	QX200 ddPCR EvaGreen Supermix	474			26.6	20.7	253	12459	12712																		1	1	4589	12680	2876.1	3071.2					25.1	22.2
F05	Absolute Quantification	ABS	1PMR_K_KRAS	Ch1Unknown	KRAS2	OK	1.1	QX200 ddPCR EvaGreen Supermix	22			1.8	0.6	12	13358	13370																		1	1	3369	6165.1	2118.3	2121.9					1.39	0.78
E06	Absolute Quantification	ABS	1PMR_K_KRAS	Ch1Unknown	KRAS2	CHECK	No Call	QX200 ddPCR EvaGreen Supermix						82	15229	15311																		1	1	2297	2557.3	2040.2	2043
G02	Absolute Quantification	ABS	2PMR_K_COX3	Ch1Unknown	COX3	OK	33.1	QX200 ddPCR EvaGreen Supermix	662			36.9	29.3	298	10443	10741																		1	1	4680	12616	2952.9	3221					35	31.2
F03	Absolute Quantification	ABS	2PMR_K_COX3	Ch1Unknown	COX3	OK	20.2	QX200 ddPCR EvaGreen Supermix	404			22.9	17.5	215	12424	12639																		1	1	4507	12283	2853.5	3013.9					21.6	18.8
G05	Absolute Quantification	ABS	2PMR_K_KRAS	Ch1Unknown	KRAS2	OK	0.43	QX200 ddPCR EvaGreen Supermix	8.6			0.94	0.15	5	13588	13593																		1	1	2394	5955.2	2098	2099.4					0.66	0.27
F06	Absolute Quantification	ABS	2PMR_K_KRAS	Ch1Unknown	KRAS2	OK	1	QX200 ddPCR EvaGreen Supermix	20			1.7	0.6	13	15192	15205																		1	1	2402	5050.4	2025.3	2027.9					1.31	0.75
H02	Absolute Quantification	ABS	3PMR_K_COX3	Ch1Unknown	COX3	OK	26.3	QX200 ddPCR EvaGreen Supermix	526			29.6	22.9	235	10403	10638																		1	1	4749	12434	2965.3	3174.4					28	24.6
G03	Absolute Quantification	ABS	3PMR_K_COX3	Ch1Unknown	COX3	OK	29.6	QX200 ddPCR EvaGreen Supermix	592			32.9	26.3	317	12442	12759																		1	1	4435	12365	2823	3060.1					31.3	27.9
H05	Absolute Quantification	ABS	3PMR_K_KRAS	Ch1Unknown	KRAS2	OK	3.6	QX200 ddPCR EvaGreen Supermix	72			4.8	2.6	42	13819	13861																		1	1	2310	2758.7	2097.7	2099.7					4.1	3
G06	Absolute Quantification	ABS	3PMR_K_KRAS	Ch1Unknown	KRAS2	OK	0.73	QX200 ddPCR EvaGreen Supermix	14.6			1.32	0.35	9	14553	14562																		1	1	2351	5351.5	2025.5	2027.6					1	0.51
A03	Absolute Quantification	ABS	4PMR_K_COX3	Ch1Unknown	COX3	OK	75	QX200 ddPCR EvaGreen Supermix	1500			80	70	788	12016	12804																		1	1	4757	12589	2915	3510.3					77.4	72.1
H03	Absolute Quantification	ABS	4PMR_K_COX3	Ch1Unknown	COX3	OK	128	QX200 ddPCR EvaGreen Supermix	2560			135	121	1213	10547	11760																		1	1	4715	12210	2790.2	3761.8					131.8	124.4
A06	Absolute Quantification	ABS	4PMR_K_KRAS	Ch1Unknown	KRAS2	CHECK	No Call	QX200 ddPCR EvaGreen Supermix						0	14579	14579																		1	1	0	0	2067.4	2067.4
H06	Absolute Quantification	ABS	4PMR_K_KRAS	Ch1Unknown	KRAS2	OK	1	QX200 ddPCR EvaGreen Supermix	20			1.7	0.6	13	15055	15068																		1	1	2222	5618.3	1991.3	1994.5					1.32	0.76
B03	Absolute Quantification	ABS	5PMR_K_COX3	Ch1Unknown	COX3	OK	41.1	QX200 ddPCR EvaGreen Supermix	822			45	37.2	430	12099	12529																		1	1	4683	12345	2892.2	3216.6					43.1	39.1
B06	Absolute Quantification	ABS	5PMR_K_KRAS	Ch1Unknown	KRAS2	CHECK	No Call	QX200 ddPCR EvaGreen Supermix						0	14449	14449																		1	1	0	0	2061.6	2061.6
D06	Absolute Quantification	ABS	H2O	Ch1NTC	KRAS2	CHECK	No Call	QX200 ddPCR EvaGreen Supermix						0	11669	11669																		1	1	0	0	2040.6	2040.6
C06	Absolute Quantification	ABS	H2O	Ch1NTC	KRAS2	OK	0.63	QX200 ddPCR EvaGreen Supermix	12.6			1.18	0.29	8	14872	14880																		1	1	2450	3745.9	2047.2	2048.1					0.88	0.43
C03	Absolute Quantification	ABS	H2O	Ch1NTC	COX3	CHECK	No Call	QX200 ddPCR EvaGreen Supermix						0	13528	13528																		1	1	0	0	2854.8	2854.8
D03	Absolute Quantification	ABS	H2O	Ch1NTC	COX3	CHECK	No Call	QX200 ddPCR EvaGreen Supermix						0	13236	13236																		1	1	0	0	2869.7	2869.7
[truncated: 9 more columns]

## Sheet: ddPCR repitition 3
Well	ExptType	Experiment	Sample	TargetType	Target	Status	Concentration	Supermix	CopiesPer20uLWell	TotalConfMax	TotalConfMin	PoissonConfMax	PoissonConfMin	Positives	Negatives	AcceptedDroplets	CNV	TotalCNVMax	TotalCNVMin	PoissonCNVMax	PoissonCNVMin	ReferenceCopies	UnknownCopies	Ratio	TotalRatioMax	TotalRatioMin	PoissonRatioMax	PoissonRatioMin	FractionalAbundance	TotalFractionalAbundanceMax	TotalFractionalAbundanceMin	PoissonFractionalAbundanceMax	PoissonFractionalAbundanceMin	ReferenceAssayNumber	TargetAssayNumber	Threshold	MeanAmplitudeofPositives	MeanAmplitudeofNegatives	MeanAmplitudeTotal	ExperimentComments	MergedWells	TotalConfMax68	TotalConfMin68	PoissonConfMax68	PoissonConfMin68	TotalCNVMax68	TotalCNVMin68	PoissonCNVMax68	PoissonCNVMin68
A01	Absolute Quantification	ABS	1PMR_PD_COX3	Ch1Unknown	COX3	OK	29.7	QX200 ddPCR EvaGreen Supermix	594			33.1	26.3	301	11774	12075																		1	1	4308	13319	3236.4	3487.7					31.4	28
B01	Absolute Quantification	ABS	2PMR_PD_COX3	Ch1Unknown	COX3	OK	1.8	QX200 ddPCR EvaGreen Supermix	36			2.8	1.1	19	12230	12249																		1	1	4113	10872	3183.9	3195.9					2.28	1.44
C01	Absolute Quantification	ABS	3PMR_PD_COX3	Ch1Unknown	COX3	OK	1.4	QX200 ddPCR EvaGreen Supermix	28			2.3	0.8	13	10995	11008																		1	1	3658	8112.4	3153.9	3159.8					1.81	1.04
D01	Absolute Quantification	ABS	4PMR_PD_COX3	Ch1Unknown	COX3	OK	3	QX200 ddPCR EvaGreen Supermix	60			4.2	2	28	11129	11157																		1	1	4011	11522	3159.7	3180.7					3.6	2.4
E01	Absolute Quantification	ABS	5PMR_PD_COX3	Ch1Unknown	COX3	OK	6.7	QX200 ddPCR EvaGreen Supermix	134			8.4	5.2	68	11904	11972																		1	1	3942	12282	3135.6	3187.6					7.5	5.9
F01	Absolute Quantification	ABS	6PMR_PD_COX3	Ch1Unknown	COX3	OK	5.4	QX200 ddPCR EvaGreen Supermix	108			6.8	4.1	59	12938	12997																		1	1	3941	10580	3112	3145.9					6.1	4.7
E03	Absolute Quantification	ABS	6PMR_PD_COX3	Ch1Unknown	COX3	OK	3.1	QX200 ddPCR EvaGreen Supermix	62			4.3	2.2	38	14205	14243																		1	1	3501	11071	2865.8	2887.7					3.7	2.7
G01	Absolute Quantification	ABS	7PMR_PD_COX3	Ch1Unknown	COX3	OK	21.1	QX200 ddPCR EvaGreen Supermix	422			23.9	18.2	210	11617	11827																		1	1	4090	12426	3122.3	3287.5					22.5	19.6
H01	Absolute Quantification	ABS	8PMR_PD_COX3	Ch1Unknown	COX3	OK	31.3	QX200 ddPCR EvaGreen Supermix	626			34.7	27.9	319	11840	12159																		1	1	3915	12459	3055.9	3302.5					33	29.5
F03	Absolute Quantification	ABS	8PMR_PD_COX3	Ch1Unknown	COX3	OK	20.3	QX200 ddPCR EvaGreen Supermix	406			23	17.7	226	12971	13197																		1	1	4404	12363	2844.6	3007.6					21.7	19
A02	Absolute Quantification	ABS	9PMR_PD_COX3	Ch1Unknown	COX3	OK	4.8	QX200 ddPCR EvaGreen Supermix	96			6.2	3.5	50	12355	12405																		1	1	3666	12231	3038.5	3075.6					5.5	4.1
G03	Absolute Quantification	ABS	9PMR_PD_COX3	Ch1Unknown	COX3	OK	4.7	QX200 ddPCR EvaGreen Supermix	94			6	3.5	53	13364	13417																		1	1	3481	11986	2830.6	2866.7					5.3	4
B02	Absolute Quantification	ABS	10PMR_PD_COX3	Ch1Unknown	COX3	OK	6.2	QX200 ddPCR EvaGreen Supermix	124			7.8	4.9	70	13238	13308																		1	1	4189	12416	3016.1	3065.6					7	5.5
C02	Absolute Quantification	ABS	11PMR_PD_COX3	Ch1Unknown	COX3	OK	17.2	QX200 ddPCR EvaGreen Supermix	344			19.7	14.8	185	12532	12717																		1	1	4484	12751	3036.6	3177.9					18.5	16
D02	Absolute Quantification	ABS	12PMR_PD_COX3	Ch1Unknown	COX3	OK	5	QX200 ddPCR EvaGreen Supermix	100			6.4	3.8	57	13454	13511																		1	1	4520	12721	3032.1	3073					5.7	4.3
E02	Absolute Quantification	ABS	13PMR_PD_COX3	Ch1Unknown	COX3	OK	3	QX200 ddPCR EvaGreen Supermix	60			4.1	2.1	32	12641	12673																		1	1	3880	11875	3009.4	3031.8					3.5	2.5
F02	Absolute Quantification	ABS	1PMR_K_COX3	Ch1Unknown	COX3	OK	27.6	QX200 ddPCR EvaGreen Supermix	552			30.7	24.4	298	12577	12875																		1	1	4842	12808	2981.3	3208.7					29.1	26
G02	Absolute Quantification	ABS	2PMR_K_COX3	Ch1Unknown	COX3	OK	27.3	QX200 ddPCR EvaGreen Supermix	546			30.5	24.2	288	12247	12535																		1	1	4557	12709	2941.2	3165.6					29	25.7
H02	Absolute Quantification	ABS	3PMR_K_COX3	Ch1Unknown	COX3	OK	19.7	QX200 ddPCR EvaGreen Supermix	394			22.4	17	204	12094	12298																		1	1	4595	12632	2946.5	3107.1					21.1	18.3
A03	Absolute Quantification	ABS	4PMR_K_COX3	Ch1Unknown	COX3	OK	53.7	QX200 ddPCR EvaGreen Supermix	1074			58.2	49.2	543	11626	12169																		1	1	4743	12617	2976.8	3407					56	51.4
B03	Absolute Quantification	ABS	5PMR_K_COX3	Ch1Unknown	COX3	OK	42.6	QX200 ddPCR EvaGreen Supermix	852			46.3	38.8	500	13571	14071																		1	1	4053	12439	2920	3258.2					44.5	40.7
H03	Absolute Quantification	ABS	5PMR_K_COX3	Ch1Unknown	COX3	OK	32.8	QX200 ddPCR EvaGreen Supermix	656			36.2	29.4	360	12726	13086																		1	1	4416	12318	2851.2	3111.6					34.5	31.1
C03	Absolute Quantification	ABS	H2O	Ch1NTC	COX3	OK	0.8	QX200 ddPCR EvaGreen Supermix	16			1.4	0.4	9	13431	13440																		1	1	3315	5610.8	2877.9	2879.7					1.08	0.55
D03	Absolute Quantification	ABS	H2O	Ch1NTC	COX3	CHECK	No Call	QX200 ddPCR EvaGreen Supermix						0	14329	14329																		1	1	0	0	2915.7	2915.7
Well	ExptType	Experiment	Sample	TargetType	Target	Status	Concentration	Supermix	CopiesPer20uLWell	TotalConfMax	TotalConfMin	PoissonConfMax	PoissonConfMin	Positives	Negatives	AcceptedDroplets	CNV	TotalCNVMax	TotalCNVMin	PoissonCNVMax	PoissonCNVMin	ReferenceCopies	UnknownCopies	Ratio	TotalRatioMax	TotalRatioMin	PoissonRatioMax	PoissonRatioMin	FractionalAbundance	TotalFractionalAbundanceMax	TotalFractionalAbundanceMin	PoissonFractionalAbundanceMax	PoissonFractionalAbundanceMin	ReferenceAssayNumber	TargetAssayNumber	Threshold	MeanAmplitudeofPositives	MeanAmplitudeofNegatives	MeanAmplitudeTotal	ExperimentComments	MergedWells	TotalConfMax68	TotalConfMin68	PoissonConfMax68	PoissonConfMin68	TotalCNVMax68	TotalCNVMin68	PoissonCNVMax68	PoissonCNVMin68
A01	Absolute Quantification	ABS	1PMR_PD_KRAS	Ch1Unknown	KRAS2	OK	1.4	QX200 ddPCR EvaGreen Supermix	28			2.2	0.8	17	14307	14324																		1	1	3049	3887.1	2644.4	2645.8					1.76	1.09
B01	Absolute Quantification	ABS	2PMR_PD_KRAS	Ch1Unknown	KRAS2	CHECK	No Call	QX200 ddPCR EvaGreen Supermix						0	13322	13322																		1	1	0	0	2715	2715
C01	Absolute Quantification	ABS	3PMR_PD_KRAS	Ch1Unknown	KRAS2	CHECK	No Call	QX200 ddPCR EvaGreen Supermix						26	12589	12615																		1	1	2854	3170.7	2615.9	2617.1
D01	Absolute Quantification	ABS	4PMR_PD_KRAS	Ch1Unknown	KRAS2	OK	3.9	QX200 ddPCR EvaGreen Supermix	78			5.1	2.9	47	14260	14307																		1	1	3243	3693.4	2588.7	2592.3					4.5	3.3
E01	Absolute Quantification	ABS	5PMR_PD_KRAS	Ch1Unknown	KRAS2	CHECK	No Call	QX200 ddPCR EvaGreen Supermix						0	14258	14258																		1	1	0	0	2652.5	2652.5
F01	Absolute Quantification	ABS	6PMR_PD_KRAS	Ch1Unknown	KRAS2	OK	4	QX200 ddPCR EvaGreen Supermix	80			5.4	2.9	40	11777	11817																		1	1	2437	2704.2	2231.9	2233.5					4.7	3.4
E03	Absolute Quantification	ABS	6PMR_PD_KRAS	Ch1Unknown	KRAS2	OK	6.1	QX200 ddPCR EvaGreen Supermix	122			7.6	4.9	79	15120	15199																		1	1	3130	3518.6	2478.1	2483.5					6.8	5.5
G01	Absolute Quantification	ABS	7PMR_PD_KRAS	Ch1Unknown	KRAS2	CHECK	No Call	QX200 ddPCR EvaGreen Supermix						0	12503	12503																		1	1	0	0	2469.4	2469.4
H01	Absolute Quantification	ABS	8PMR_PD_KRAS	Ch1Unknown	KRAS2	CHECK	No Call	QX200 ddPCR EvaGreen Supermix						0	12076	12076																		1	1	0	0	1982.7	1982.7
F03	Absolute Quantification	ABS	8PMR_PD_KRAS	Ch1Unknown	KRAS2	CHECK	No Call	QX200 ddPCR EvaGreen Supermix						0	15906	15906																		1	1	0	0	2443	2443
A02	Absolute Quantification	ABS	9PMR_PD_KRAS	Ch1Unknown	KRAS2	CHECK	No Call	QX200 ddPCR EvaGreen Supermix						0	12405	12405																		1	1	0	0	1855.8	1855.8
G03	Absolute Quantification	ABS	9PMR_PD_KRAS	Ch1Unknown	KRAS2	CHECK	No Call	QX200 ddPCR EvaGreen Supermix						0	16153	16153																		1	1	0	0	2451.4	2451.4
B02	Absolute Quantification	ABS	10PMR_PD_KRAS	Ch1Unknown	KRAS2	CHECK	No Call	QX200 ddPCR EvaGreen Supermix						0	12651	12651																		1	1	0	0	2390.4	2390.4
C02	Absolute Quantification	ABS	11PMR_PD_KRAS	Ch1Unknown	KRAS2	OK	1.8	QX200 ddPCR EvaGreen Supermix	36			2.7	1.1	18	11884	11902																		1	1	2159	2863.2	1933.7	1935.1					2.23	1.39
D02	Absolute Quantification	ABS	12PMR_PD_KRAS	Ch1Unknown	KRAS2	OK	0.55	QX200 ddPCR EvaGreen Supermix	11			1.12	0.22	6	12841	12847																		1	1	2919	4634.2	2584.8	2585.8					0.81	0.35
E02	Absolute Quantification	ABS	13PMR_PD_KRAS	Ch1Unknown	KRAS2	CHECK	No Call	QX200 ddPCR EvaGreen Supermix						28	12683	12711																		1	1	2546	2805.4	2333.1	2334.1
F02	Absolute Quantification	ABS	1PMR_K_KRAS	Ch1Unknown	KRAS2	CHECK	No Call	QX200 ddPCR EvaGreen Supermix						0	13009	13009																		1	1	0	0	2551.6	2551.6
G02	Absolute Quantification	ABS	2PMR_K_KRAS	Ch1Unknown	KRAS2	OK	1.8	QX200 ddPCR EvaGreen Supermix	36			2.7	1.2	22	14031	14053																		1	1	2872	3417.8	2517	2518.4					2.26	1.48
H02	Absolute Quantification	ABS	3PMR_K_KRAS	Ch1Unknown	KRAS2	OK	3.1	QX200 ddPCR EvaGreen Supermix	62			4.3	2.1	33	12602	12635																		1	1	3120	3684.9	2505.8	2508.9					3.6	2.6
A03	Absolute Quantification	ABS	4PMR_K_KRAS	Ch1Unknown	KRAS2	CHECK	No Call	QX200 ddPCR EvaGreen Supermix						32	13585	13617																		1	1	2889	3785.9	2527.5	2530.4
B03	Absolute Quantification	ABS	5PMR_K_KRAS	Ch1Unknown	KRAS2	OK	2.9	QX200 ddPCR EvaGreen Supermix	58			4	2.1	35	13988	14023																		1	1	3079	4888.4	2502.6	2508.6					3.46	2.47
H03	Absolute Quantification	ABS	5PMR_K_KRAS	Ch1Unknown	KRAS2	OK	6	QX200 ddPCR EvaGreen Supermix	120			7.4	4.7	74	14549	14623																		1	1	3274	4187.1	2405	2414.1					6.7	5.3
C03	Absolute Quantification	ABS	H2O	Ch1NTC	KRAS2	CHECK	No Call	QX200 ddPCR EvaGreen Supermix						0	14629	14629																		1	1	0	0	2506.1	2506.1
D03	Absolute Quantification	ABS	H2O	Ch1NTC	KRAS2	CHECK	No Call	QX200 ddPCR EvaGreen Supermix						0	15597	15597																		1	1	0	0	1635.8	1635.8
[truncated: 9 more columns]

## Sheet: Poisson equation - calculations
ddPCR repition 1															ddPCR repition 2														ddPCR repition 3
Sample	Target	Total	p(positives/total)	1-p	"-logN"	Copy Number	nl->ul		Copies per total droplets	Copies per 22ul					Sample	Target	Total	p (positives/total)	1-p	"-logN"	Copy number	nl -> ul		Copies per total droplets	Copies per 22 µl				Sample	Target	Total	p(positives/total)	1-p	"-logN"	Copy number	nl->ul		copies per total droplets	copies per 22ul
1PMR_PD_COX3	COX3	7375	0,023728813559322	0.976271	0.0240149	177.11	7.375	6.26875	28,2527955339692	621.562					1PMR_PD_COX3	COX3	11647	0,0195758564437194	0,980424143556281	0.01977	230.261	11.647	9.89995	23,258825177651	511.694				1PMR_PD_COX3	COX3	12075	0,0249275362318841	0,975072463768116	0.0252435	304.815	12.075	10.2637	29,6982222736079	653.361
1PMR_PD_COX3	COX3	8546	0,0168499882986192	0.98315	0.0169936	145.227	8.546	7.2641	19,9924287936974	439.833					1PMR_PD_KRAS	KRAS2	14353	0,00167212429457256	0,998327875705427	0.00167352	24.0201	14.353	12.2	1,96885159385635	43.3147				1PMR_PD_KRAS	KRAS2	14324	0,00118681932421111	0,998813180675789	0.00118752	17.0101	14.324	12.1754	1,39708723763438	30.7359
1PMR_PD_KRAS2	KRAS2	13068	0	1	0	0	13.068	11.1078	0	0					2PMR_PD_COX3	COX3	12251	0,00204064974287813	0,997959350257122	0.00204273	25.0255	12.251	10.4133	2,40321730058789	52.8708				2PMR_PD_COX3	COX3	12249	0,00155114703241081	0,998448852967589	0.00155235	19.0148	12.249	10.4116	1,82629565466776	40.1785
1PMR_PD_KRAS2	KRAS2	13823	0	1	0	0	13.823	11.7495	0	0					2PMR_PD_KRAS	KRAS2	13714	0	1	0	0	13.714	11.6569	0	0				2PMR_PD_KRAS	KRAS2	13322	0	1	0	0	13.322	11.3237	0	0
2PMR_PD_COX3	COX3	13081	0,00183472211604617	0.998165	0.00183641	24.022	13.081	11.1189	2,16047915316291	47.5305					3PMR_PD_COX3	COX3	11587	0,00172607232243031	0,99827392767757	0.00172756	20.0173	11.587	9.84895	2,03242788430651	44.7134				3PMR_PD_COX3	COX3	11008	0,00118095930232558	0,998819040697674	0.00118166	13.0077	11.008	9.3568	1,39018492266322	30.5841
2PMR_PD_COX3	COX3	10708	0	1	0	0	10.708	9.1018	0	0					3PMR_PD_KRAS	KRAS2	14294	0	1	0	0	14.294	12.1499	0	0				3PMR_PD_KRAS	KRAS2	12615	0,00206103844629409	0,997938961553706	0.00206317	26.0268	12.615	10.7227	2,4272533045868	53.3996
2PMR_PD_KRAS2	KRAS2	12188	0	1	0	0	12.188	10.3598	0	0					4PMR_PD_COX3	COX3	11493	0,00374140781345167	0,996258592186548	0.00374842	43.0806	11.493	9.76905	4,40991104279212	97.018				4PMR_PD_COX3	COX3	11157	0,00250963520659676	0,997490364793403	0.00251279	28.0352	11.157	9.48345	2,95622308206451	65.0369
2PMR_PD_KRAS2	KRAS2	13450	0,00156133828996283	0.998439	0.00156256	21.0164	13.45	11.4325	1,83830405742343	40.4427					4PMR_PD_KRAS	KRAS2	13494	0	1	0	0	13.494	11.4699	0	0				4PMR_PD_KRAS	KRAS2	14307	0,00328510519326204	0,996714894806738	0.00329051	47.0774	14.307	12.1609	3,87119176240828	85.1662
3PMR_PD_COX3	COX3	12237	0,000817193756639699	0.999183	0.000817528	10.0041	12.237	10.4015	0,961797460562428	21.1595					5PMR_PD_COX3	COX3	11986	0,00575671616886367	0,994243283831136	0.00577335	69.1994	11.986	10.1881	6,79217638508788	149.428				5PMR_PD_COX3	COX3	11972	0,00567991981289676	0,994320080187103	0.00569611	68.1939	11.972	10.1762	6,70130811731369	147.429
3PMR_PD_COX3	COX3	11717	0,000853460783476999	0.999147	0.000853825	10.0043	11.717	9.95945	1,00450022174491	22.099					5PMR_PD_KRAS	KRAS2	12426	0,00144857556735876	0,998551424432641	0.00144963	18.013	12.426	10.5621	1,70544207913488	37.5197				5PMR_PD_KRAS	KRAS2	14258	0	1	0	0	14.258	12.1193	0	0
3PMR_PD_KRAS2	KRAS2	10437	0	1	0	0	10.437	8.87145	0	0					6PMR_PD_COX3	COX3	12167	0,00287663351688995	0,99712336648311	0.00288078	35.0504	12.167	10.3419	3,38915173997347	74.5613				6PMR_PD_COX3	COX3	12997	0,00453950911748865	0,995460490882511	0.00454984	59.1343	12.997	11.0474	5,35275762077417	117.761
3PMR_PD_KRAS2	KRAS2	12975	0,00192678227360308	0.998073	0.00192864	25.0241	12.975	11.0287	2,26898930165364	49.9178					6PMR_PD_KRAS	KRAS2	13199	0,0029547693007046	0,997045230699295	0.00295914	39.0577	13.199	11.2191	3,48134499958449	76.5896				6PMR_PD_COX3	COX3	14243	0,00266797725198343	0,997332022748017	0.00267154	38.0508	14.243	12.1066	3,1429913485852	69.1458
4PMR_PD_COX3	COX3	11979	0,00392353284915268	0.996076	0.00393125	47.0924	11.979	10.1822	4,62500011375517	101.75					7PMR_PD_COX3	COX3	11845	0,0260869565217391	0,973913043478261	0.0264333	313.102	11.845	10.0683	31,0979494919475	684.155				6PMR_PD_KRAS	KRAS2	11817	0,00338495388000338	0,996615046119997	0.0033907	40.0679	11.817	10.0444	3,98905387937264	87.7592
4PMR_PD_COX3	COX3	10412	0	1	0	0	10.412	8.8502	0	0					7PMR_PD_KRAS	KRAS2	13484	0,00140907742509641	0,998590922574904	0.00141007	19.0134	13.484	11.4614	1,65890718617841	36.496				6PMR_PD_KRAS	KRAS2	15199	0,00519771037568261	0,994802289624317	0.00521127	79.206	15.199	12.9192	6,13090054463241	134.88
4PMR_PD_KRAS2	KRAS2	10074	0	1	0	0	10.074	8.5629	0	0					8PMR_PD_COX3	COX3	11683	0,00213986133698536	0,997860138663015	0.00214215	25.0268	11.683	9.93055	2,52018130782693	55.444				7PMR_PD_COX3	COX3	11827	0,0177559820749133	0,982244017925087	0.0179155	211.887	11.827	10.0529	21,0770714560491	463.696
4PMR_PD_KRAS2	KRAS2	12937	0	1	0	0	12.937	10.9964	0	0					8PMR_PD_KRAS	KRAS2	12883	0,00636497710160677	0,993635022898393	0.00638532	82.2621	12.883	10.9505	7,51214110048858	165.267				7PMR_PD_KRAS	KRAS2	12503	0	1	0	0	12.503	10.6275	0	0
5PMR_PD_COX3	COX3	11701	0,0067515596957525	0.993248	0.00677445	79.2679	11.701	9.94585	7,96994656930238	175.339					9PMR_PD_COX3	COX3	12869	0,00512860362110498	0,994871396378895	0.0051418	66.1698	12.869	10.9386	6,04917652645398	133.082				8PMR_PD_COX3	COX3	12159	0,026235710173534	0,973764289826466	0.026586	323.259	12.159	10.3352	31,2776551275548	688.108
5PMR_PD_KRAS2	KRAS2	13305	0	1	0	0	13.305	11.3092	0	0					9PMR_PD_KRAS	KRAS2	13019	0,00645210845687073	0,993547891543129	0.00647301	84.2722	13.019	11.0662	7,61530973796224	167.537				8PMR_PD_COX3	COX3	13197	0,0171251041903463	0,982874895809654	0.0172734	227.958	13.197	11.2175	20,3216878543012	447.077
6PMR_PD_COX3	COX3	12246	0,00220480156785889	0.997795	0.00220724	27.0298	12.246	10.4091	2,59674790750292	57.1285					10PMR_PD_COX3	COX3	13660	0,0112005856515373	0,988799414348463	0.0112638	153.863	13.66	11.611	13,2515112517843	291.533				8PMR_PD_KRAS	KRAS2	12076	0	1	0	0	12.076	10.2646	0	0
6PMR_PD_KRAS2	KRAS2	11259	0	1	0	0	11.259	9.57015	0	0					10PMR_PD_KRAS	KRAS2	12436	0,00160823415889353	0,998391765841106	0.00160953	20.0161	12.436	10.5706	1,89356324193518	41.6584				8PMR_PD_KRAS	KRAS2	15906	0	1	0	0	15.906	13.5201	0	0
7PMR_PD_COX3	COX3	11214	0,0218476903870162	0.978152	0.0220899	247.716	11.214	9.5319	25,9881003203337	571.738					11PMR_PD_COX3	COX3	12921	0,0181100534014395	0,981889946598561	0.018276	236.145	12.921	10.9829	21,5012324489664	473.027				9PMR_PD_COX3	COX3	12405	0,00403063280935107	0,995969367190649	0.00403878	50.101	12.405	10.5442	4,75150318022456	104.533
7PMR_PD_KRAS2	KRAS2	13018	0	1	0	0	13.018	11.0653	0	0					11PMR_PD_KRAS	KRAS2	12597	0,000317535921251092	0,999682464078749	0.000317586	4.00064	12.597	10.7074	0,373630995831203	8.21988				9PMR_PD_COX3	COX3	13417	0,00395021241708281	0,996049787582917	0.00395804	53.105	13.417	11.4044	4,65651189861737	102.443
8PMR_PD_COX3	COX3	12676	0,0216156516251183	0.978384	0.0218527	277.005	12.676	10.7746	25,70904929528	565.599					12PMR_PD_COX3	COX3	13144	0,00509738283627511	0,994902617163725	0.00511042	67.1713	13.144	11.1724	6,01225742423723	132.27				9PMR_PD_KRAS	KRAS2	12405	0	1	0	0	12.405	10.5442	0	0
8PMR_PD_KRAS2	KRAS2	12205	0,00122900450634986	0.998771	0.00122976	15.0092	12.205	10.3742	1,44677688440384	31.8291					12PMR_PD_KRAS	KRAS2	12854	0	1	0	0	12.854	10.9259	0	0				9PMR_PD_KRAS	KRAS2	16153	0	1	0	0	16.153	13.73	0	0
9PMR_PD_COX3	COX3	12541	0,00358823060362013	0.996412	0.00359468	45.0809	12.541	10.6599	4,22903969950888	93.0389					13PMR_PD_COX3	COX3	12378	0,00339311682016481	0,996606883179835	0.00339889	42.0714	12.378	10.5213	3,998689995525	87.9712				10PMR_PD_COX3	COX3	13308	0,0052599939885783	0,994740006011422	0.00527388	70.1847	13.308	11.3118	6,20456054058701	136.5
9PMR_PD_KRAS2	KRAS2	12973	0	1	0	0	12.973	11.0271	0	0					13PMR_PD_KRAS	KRAS2	12825	0,000623781676413255	0,999376218323587	0.000623976	8.0025	12.825	10.9013	0,734089775465862	16.15				10PMR_PD_KRAS	KRAS2	12651	0	1	0	0	12.651	10.7533	0	0
10PMR_PD_COX3	COX3	13128	0,00723644119439366	0.992764	0.00726275	95.3454	13.128	11.1588	8,54441322259658	187.977																			11PMR_PD_COX3	COX3	12717	0,0145474561610443	0,985452543838956	0.0146543	186.359	12.717	10.8095	17,2403622925461	379.288
10PMR_PD_KRAS2	KRAS2	13965	0	1	0	0	13.965	11.8703	0	0					1PMR_K_COX3	COX3	12086	0,0354956147608804	0,96450438523912	0.0361409	436.799	12.086	10.2731	42,518705884319	935.412				11PMR_PD_KRAS	KRAS2	11902	0,00151235086540077	0,998487649134599	0.0015135	18.0136	11.902	10.1167	1,78058308505808	39.1728
11PMR_PD_COX3	COX3	12179	0,0201987026849495	0.979801	0.0204055	248.518	12.179	10.3521	24,0064537852409	528.142					1PMR_K_COX3	COX3	12712	0,01990245437382	0,98009754562618	0.0201032	255.552	12.712	10.8052	23,6507951972808	520.317				12PMR_PD_COX3	COX3	13511	0,00421878469395308	0,995781215306047	0.00422771	57.1206	13.511	11.4844	4,97377514636223	109.423
11PMR_PD_KRAS2	KRAS2	13468	0,00155925155925156	0.998441	0.00156047	21.0164	13.468	11.4478	1,8358452436413	40.3886					1PMR_K_KRAS	KRAS2	13370	0,000897531787584144	0,999102468212416	0.000897935	12.0054	13.37	11.3645	1,05639389459699	23.2407				12PMR_PD_KRAS	KRAS2	12847	0,000467035105472095	0,999532964894528	0.000467144	6.0014	12.847	10.92	0,54958141215951	12.0908
12PMR_PD_COX3	COX3	11964	0,00392845202273487	0.996072	0.00393619	47.0926	11.964	10.1694	4,63081018709699	101.878					1PMR_K_KRAS	KRAS2	15311	0,00535562667363334	0,994644373326367	0.00537002	82.2204	15.311	13.0144	6,31766994518106	138.989				13PMR_PD_COX3	COX3	12673	0,00252505326284226	0,997474946737158	0.00252825	32.0405	12.673	10.7721	2,97440774883098	65.437
12PMR_PD_KRAS2	KRAS2	13077	0,000917641660931406	0.999082	0.000918063	12.0055	13.077	11.1154	1,08007406092878	23.7616					2PMR_K_COX3	COX3	10741	0,0277441578996369	0,972255842100363	0.0281363	302.212	10.741	9.12985	33,101526021763	728.234				13PMR_PD_KRAS	KRAS2	12711	0,00220281645818582	0,997797183541814	0.00220525	28.0309	12.711	10.8043	2,59440732616412	57.077
13PMR_PD_COX3	COX3	10401	0,00682626670512451	0.993174	0.00684967	71.2434	10.401	8.84085	8,05843792876344	177.286					2PMR_K_COX3	COX3	12639	0,0170108394651476	0,982989160534852	0.0171572	216.85	12.639	10.7431	20,1849244924749	444.068
13PMR_PD_KRAS2	KRAS2	13063	0	1	0	0	13.063	11.1036	0	0					2PMR_K_KRAS	KRAS2	13593	0,00036783638637534	0,999632163613625	0.000367904	5.00092	13.593	11.5541	0,432828299733018	9.52222				1PMR_K_COX3	COX3	12875	0,0231456310679612	0,976854368932039	0.0234177	301.503	12.875	10.9437	27,5502323350367	606.105
															2PMR_K_KRAS	KRAS2	15205	0,00085498191384413	0,999145018086156	0.000855348	13.0056	15.205	12.9242	1,00629131687425	22.1384				1PMR_K_KRAS	KRAS2	13009	0	1	0	0	13.009	11.0577	0	0
1PMR_K_COX3	COX3	8855	0	1	0	0	8.855	7.52675	0	0					3PMR_K_COX3	COX3	10638	0,022090618537319	0,977909381462681	0.0223383	237.635	10.638	9.0423	26,280317919256	578.167				2PMR_K_COX3	COX3	12535	0,0229756681292381	0,977024331870762	0.0232437	291.36	12.535	10.6547	27,3455559660074	601.602
1PMR_K_KRAS2	KRAS2	12699	0,00165367351759981	0.998346	0.00165504	21.0174	12.699	10.7942	1,94710864108435	42.8364					3PMR_K_COX3	COX3	12759	0,0248452073046477	0,975154792695352	0.0251591	321.004	12.759	10.8452	29,5988927609158	651.176				2PMR_K_KRAS	KRAS2	14053	0,00156550202803672	0,998434497971963	0.00156673	22.0172	14.053	11.9451	1,84321024323453	40.5506
2PMR_K_COX3	COX3	12316	0,0238713868139006	0.976129	0.0241609	297.566	12.316	10.4686	28,4246181709218	625.342					3PMR_K_KRAS	KRAS2	13861	0,00303008440949426	0,996969915590506	0.00303468	42.0638	13.861	11.7819	3,57021695278605	78.5448				3PMR_K_COX3	COX3	12298	0,016588063099691	0,983411936900309	0.0167272	205.711	12.298	10.4533	19,6790419767727	432.939
2PMR_K_KRAS2	KRAS2	12885	0	1	0	0	12.885	10.9522	0	0					3PMR_K_KRAS	KRAS2	14562	0,000618046971569839	0,99938195302843	0.000618238	9.00278	14.562	12.3777	0,72733887215328	16.0015				3PMR_K_KRAS	KRAS2	12635	0,00261179263949347	0,997388207360506	0.00261521	33.0432	12.635	10.7397	3,07671684740504	67.6878
3PMR_K_COX3	COX3	11125	0,0264269662921348	0.973573	0.0267824	297.955	11.125	9.45625	31,5087472925927	693.192					4PMR_K_COX3	COX3	12804	0,0615432677288347	0,938456732271165	0.0635185	813.291	12.804	10.8834	74,7276789245153	1644.01				4PMR_K_COX3	COX3	12169	0,0446215794231243	0,955378420576876	0.0456478	555.488	12.169	10.3437	53,7032530300044	1181.47
3PMR_K_KRAS2	KRAS2	11912	0,000755540631296172	0.999244	0.000755826	9.0034	11.912	10.1252	0,8892072893707	19.5626					4PMR_K_COX3	COX3	11760	0,103146258503401	0,896853741496599	0.108862	1280.22	11.76	9.996	128,073509618827	2817.62				4PMR_K_KRAS	KRAS2	13617	0,00235000367188074	0,997649996328119	0.00235277	32.0377	13.617	11.5745	2,76796384014992	60.8952
4PMR_K_COX3	COX3	13697	0,0894356428414981	0.910564	0.0936907	1283.28	13.697	11.6425	110,224351761422	2424.94					4PMR_K_KRAS	KRAS2	14579	0	1	0	0	14.579	12.3922	0	0				5PMR_K_COX3	COX3	14071	0,0355340771800156	0,964465922819984	0.0361808	509.1	14.071	11.9604	42,5656220081004	936.444
4PMR_K_KRAS2	KRAS2	13885	0,00072020165646381	0.99928	0.000720461	10.0036	13.885	11.8022	0,847601325017244	18.6472					4PMR_K_KRAS	KRAS2	15068	0,000862755508362092	0,999137244491638	0.000863128	13.0056	15.068	12.8078	1,015444583644	22.3398				5PMR_K_COX3	COX3	13086	0,0275103163686382	0,972489683631362	0.0278958	365.045	13.086	11.1231	32,8186019258192	722.009
5PMR_K_COX3	COX3	13951	0,0338327001648627	0.966167	0.0344183	480.169	13.951	11.8583	40,492084152751	890.826					5PMR_K_COX3	COX3	12529	0,0343203767259957	0,965679623274004	0.0349232	437.552	12.529	10.6496	41,0860620047943	903.893				5PMR_K_KRAS	KRAS2	14023	0,00249589959352492	0,997504100406475	0.00249902	35.0438	14.023	11.9195	2,94002299221699	64.6805
5PMR_K_KRAS2	KRAS2	13909	0,00115033431591056	0.99885	0.001151	16.0092	13.909	11.8226	1,35411348031594	29.7905					5PMR_K_KRAS	KRAS2	14449	0	1	0	0	14.449	12.2816	0	0
																													H2O	KRAS2	14629	0	1	0	0	14.629	12.4346	0	0
H2O	COX3	9758	0	1	0	0	9.758	8.2943	0	0					H2O	KRAS2	11669	0	1	0	0	11.669	9.91865	0	0				H2O	KRAS2	15597	0	1	0	0	15.597	13.2574	0	0
H2O	COX3	9928	0	1	0	0	9.928	8.4388	0	0					H2O	KRAS2	14880	0,000537634408602151	0,999462365591398	0.000537779	8.00215	14.88	12.648	0,632681159767951	13.919				H2O	COX3	13440	0,000669642857142857	0,999330357142857	0.000669867	9.00301	13.44	11.424	0,78807902125347	17.3377
H2O	KRAS2	13026	0	1	0	0	13.026	11.0721	0	0					H2O	COX3	13528	0	1	0	0	13.528	11.4988	0	0				H2O	COX3	14329	0	1	0	0	14.329	12.1797	0	0
H2O	KRAS2	14136	0	1	0	0	14.136	12.0156	0	0					H2O	COX3	13236	0	1	0	0	13.236	11.2506	0	0

## Sheet: ddPCR results - sum up 
ddPCR repition 1				ddPCR repition 2				ddPCR repition 3
Sample	Copies per 22ul	Average		Sample	Copies per 22 µl			Sample	copies per 22ul	Average				Sample	Copies per 22 ul - average from 3 replicates	500 ul of CSF taken for ccf-DNA isolation
1PMR_PD_COX3	621.562	530.697		1PMR_PD_COX3	511.694			1PMR_PD_COX3	653.361					1PMR_PD_COX3	565.251
1PMR_PD_COX3	439.833			1PMR_PD_KRAS	43.3147			1PMR_PD_KRAS	30.7359					1PMR_PD_KRAS	24.6836
1PMR_PD_KRAS2	0	0		2PMR_PD_COX3	52.8708			2PMR_PD_COX3	40.1785					2PMR_PD_COX3	38.9382
1PMR_PD_KRAS2	0			2PMR_PD_KRAS	0			2PMR_PD_KRAS	0					2PMR_PD_KRAS	6.74045
2PMR_PD_COX3	47.5305	23.7653		3PMR_PD_COX3	44.7134			3PMR_PD_COX3	30.5841					3PMR_PD_COX3	32.3089
2PMR_PD_COX3	0			3PMR_PD_KRAS	0			3PMR_PD_KRAS	53.3996					3PMR_PD_KRAS	26.1195
2PMR_PD_KRAS2	0	20.2213		4PMR_PD_COX3	97.018			4PMR_PD_COX3	65.0369					4PMR_PD_COX3	70.9767
2PMR_PD_KRAS2	40.4427			4PMR_PD_KRAS	0			4PMR_PD_KRAS	85.1662					4PMR_PD_KRAS	28.3887
3PMR_PD_COX3	21.1595	21.6293		5PMR_PD_COX3	149.428			5PMR_PD_COX3	147.429					5PMR_PD_COX3	157.398
3PMR_PD_COX3	22.099			5PMR_PD_KRAS	37.5197			5PMR_PD_KRAS	0					5PMR_PD_KRAS	12.5066
3PMR_PD_KRAS2	0	24.9589		6PMR_PD_COX3	74.5613			6PMR_PD_COX3	117.761	93.4532				6PMR_PD_COX3	75.0477
3PMR_PD_KRAS2	49.9178			6PMR_PD_KRAS	76.5896			6PMR_PD_COX3	69.1458					6PMR_PD_KRAS	62.6364
4PMR_PD_COX3	101.75	50.875		7PMR_PD_COX3	684.155			6PMR_PD_KRAS	87.7592	111.319				7PMR_PD_COX3	573.196
4PMR_PD_COX3	0			7PMR_PD_KRAS	36.496			6PMR_PD_KRAS	134.88					7PMR_PD_KRAS	12.1653
4PMR_PD_KRAS2	0	0		8PMR_PD_COX3	55.444			7PMR_PD_COX3	463.696					8PMR_PD_COX3	396.212
4PMR_PD_KRAS2	0			8PMR_PD_KRAS	165.267			7PMR_PD_KRAS	0					8PMR_PD_KRAS	65.6987
5PMR_PD_COX3	175.339			9PMR_PD_COX3	133.082			8PMR_PD_COX3	688.108	567.593				9PMR_PD_COX3	109.87
5PMR_PD_KRAS2	0			9PMR_PD_KRAS	167.537			8PMR_PD_COX3	447.077					9PMR_PD_KRAS	55.8456
6PMR_PD_COX3	57.1285			10PMR_PD_COX3	291.533			8PMR_PD_KRAS	0	0				10PMR_PD_COX3	205.337
6PMR_PD_KRAS2	0			10PMR_PD_KRAS	41.6584			8PMR_PD_KRAS	0					10PMR_PD_KRAS	13.8861
7PMR_PD_COX3	571.738			11PMR_PD_COX3	473.027			9PMR_PD_COX3	104.533	103.488				11PMR_PD_COX3	460.152
7PMR_PD_KRAS2	0			11PMR_PD_KRAS	8.21988			9PMR_PD_COX3	102.443					11PMR_PD_KRAS	29.2604
8PMR_PD_COX3	565.599			12PMR_PD_COX3	132.27			9PMR_PD_KRAS	0	0				12PMR_PD_COX3	114.524
8PMR_PD_KRAS2	31.8291			12PMR_PD_KRAS	0			9PMR_PD_KRAS	0					12PMR_PD_KRAS	11.9508
9PMR_PD_COX3	93.0389			13PMR_PD_COX3	87.9712			10PMR_PD_COX3	136.5					13PMR_PD_COX3	110.231
9PMR_PD_KRAS2	0			13PMR_PD_KRAS	16.15			10PMR_PD_KRAS	0					13PMR_PD_KRAS	24.409
10PMR_PD_COX3	187.977							11PMR_PD_COX3	379.288
10PMR_PD_KRAS2	0							11PMR_PD_KRAS	39.1728
11PMR_PD_COX3	528.142							12PMR_PD_COX3	109.423
11PMR_PD_KRAS2	40.3886							12PMR_PD_KRAS	12.0908
12PMR_PD_COX3	101.878							13PMR_PD_COX3	65.437
12PMR_PD_KRAS2	23.7616							13PMR_PD_KRAS	57.077
13PMR_PD_COX3	177.286
13PMR_PD_KRAS2	0
Sample	Copies per 22ul			Sample	Copies per 22ul	Average		Sample	Copies per 22ul	Average				Sample	Copies per 22 ul - average from 3 replicates	Copies per 22 ul calculated for the same CSF volume	1 ml of CSF taken for ccf-DNA isolation, results divided by 2
1PMR_K_COX3	0			1PMR_K_COX3	935.412	727.865		1PMR_K_COX3	606.105					1PMR_K_COX3	444.657	222.328
1PMR_K_KRAS2	42.8364			1PMR_K_COX3	520.317			1PMR_K_KRAS	0					1PMR_K_KRAS2	41.317	20.6585
2PMR_K_COX3	625.342			1PMR_K_KRAS	23.2407	81.1147		2PMR_K_COX3	601.602					2PMR_K_COX3	604.365	302.182
2PMR_K_KRAS2	0			1PMR_K_KRAS	138.989			2PMR_K_KRAS	40.5506					2PMR_K_KRAS2	18.7936	9.39682
3PMR_K_COX3	693.192			2PMR_K_COX3	728.234	586.151		3PMR_K_COX3	432.939					3PMR_K_COX3	580.268	290.134
3PMR_K_KRAS2	19.5626			2PMR_K_COX3	444.068			3PMR_K_KRAS	67.6878					3PMR_K_KRAS2	44.8411	22.4206
4PMR_K_COX3	2424.94			2PMR_K_KRAS	9.52222	15.8303		4PMR_K_COX3	1181.47					4PMR_K_COX3	1945.74	972.87
4PMR_K_KRAS2	18.6472			2PMR_K_KRAS	22.1384			4PMR_K_KRAS	60.8952					4PMR_K_KRAS2	30.2374	15.1187
5PMR_K_COX3	890.826			3PMR_K_COX3	578.167	614.671		5PMR_K_COX3	936.444	829.226				5PMR_K_COX3	874.649	437.324
5PMR_K_KRAS2	29.7905			3PMR_K_COX3	651.176			5PMR_K_COX3	722.009					5PMR_K_KRAS2	42.5954	21.2977
				3PMR_K_KRAS	78.5448	47.2731		5PMR_K_KRAS	64.6805	97.9956
				3PMR_K_KRAS	16.0015			5PMR_K_KRAS	131.311
				4PMR_K_COX3	1644.01	2230.81
				4PMR_K_COX3	2817.62
				4PMR_K_KRAS	0	11.1699
				4PMR_K_KRAS	22.3398
				5PMR_K_COX3	903.893
				5PMR_K_KRAS	0
